# Supplementary material
Source: MDPI journal article supplement (https://www.mdpi.com/2220-9964/9/8/489)
Supplement: s1 [file s1]

## Differences between Individual MCA Variants

### *Differences between the Theorists variant and other variants*

In the same way, the differences were compared against the second chosen standard - the variant Theorists. Numerical data are given in the table (Table 1), the spatial distribution of differences is on the maps (Figure 1).

**Table 1.** Absolute numbers and percentage share of differences from all pixels in the Jedovnice area for individual MCA variants related to the Theorists variant

| Difference  | Theorists - Experts |                | Theorists - Variant 3 |                | Theorists - Pairs |                | Theorists - MES |                | Theorists - Saaty |                |
|-------------|---------------------|----------------|-----------------------|----------------|-------------------|----------------|-----------------|----------------|-------------------|----------------|
|             | Cells num.          | % of all cells | Cells num.            | % of all cells | Cells num.        | % of all cells | Cells num.      | % of all cells | Cells num.        | % of all cells |
| -1          | 257                 | 1.83           | 516                   | 3.68           | 88                | 0.63           | 360             | 2.56           | 397               | 2.83           |
| 0           | 11273               | 80.31          | 11615                 | 82.75          | 12516             | 89.17          | 9734            | 69.35          | 10942             | 77.96          |
| 1           | 2506                | 17.85          | 1905                  | 13.57          | 1432              | 10.20          | 3942            | 28.08          | 2697              | 19.21          |
| Cells total | 14036               | 100.00         | 14036                 | 100.00         | 14036             | 100.00         | 14036           | 100.00         | 14036             | 100.00         |

From the table (Table 1) it is clear that the variant Theorists quite significantly overestimates the suitability of the environment in relation to other variants of the MCA. The highest overestimation occurs in comparison with the MES variant, when almost 30% of the location area is rated better in this variant. However, it does not show greater conformity with any variant. This fact is also evident from the figures (Figure 1).

All significant differences are located mainly in the open landscape in the southern half of the assessed area. With the exception of the Pairs variant, there is also an underestimation in the built-up areas on the north-eastern edge of Jedovnice.

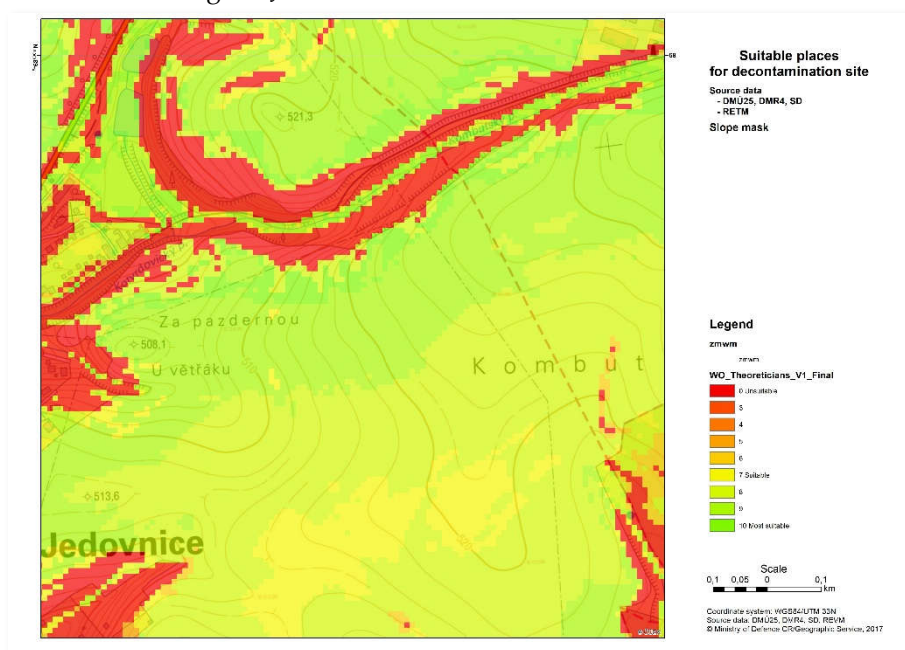

(a)

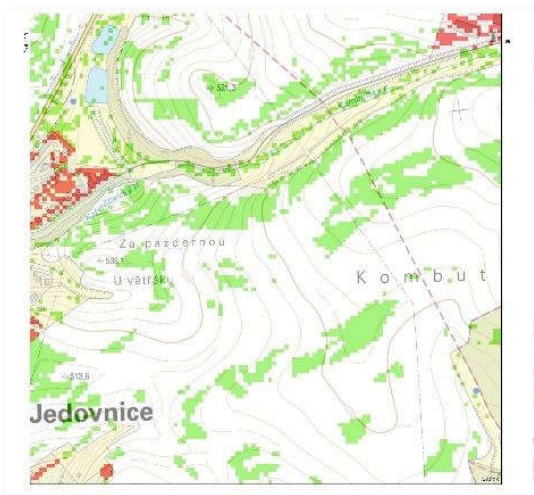

(b)

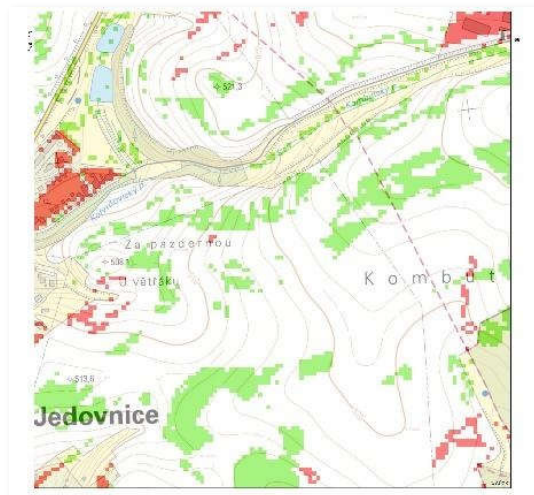

(c)

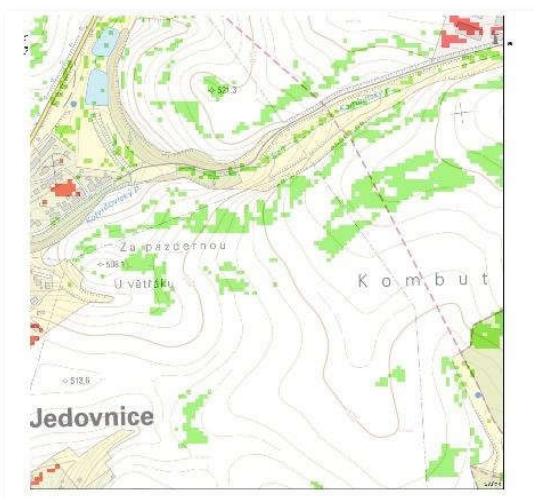

(d)

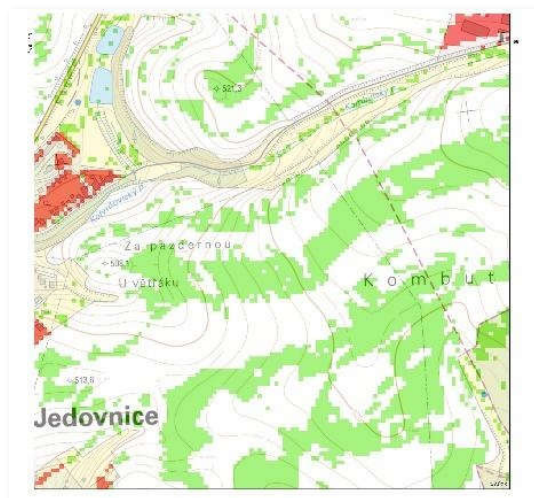

(e)

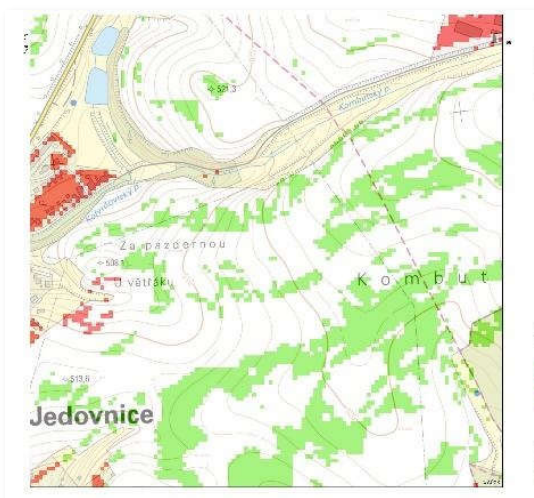

(f)

**Figure 1.** Differences in cost maps of landscape potential for DS deployment for the MCA variants from the Jedovnice area in relation to the Theorists variant – (a) Theorists cost map, (b) differences with the Experts variant, (c) differences with the Var. 3, (d) differences with the Pairs variant, (e) differences with the MES variant, (f) differences with the Saaty variant. Legend: red indicates the difference -1, green the difference +1, white identical areas.

### Differences between the Variant 3 and other variants

Variant 3 shows a relatively high conformity in the evaluation with all remaining variants, with the exception of the Theorists and MES variants. Compared to the Theorists variant, the assessed variant slightly underestimates the space, on the contrary, in comparison with the variant MES, the assessed variant quite significantly overestimates the suitability of the space, as is clear from the absolute numbers given in the table (Table 2).

**Table 2.** Absolute numbers and percentage share of differences from all pixels in the Jedovnice area for individual MCA variants related to the Variant 3

| Difference  | Variant 3 - Experts |                | Variant 3 - Theorists |                | Variant 3 - Pairs |                | Variant 3 - MES |                | Variant 3 - Saaty |                |
|-------------|---------------------|----------------|-----------------------|----------------|-------------------|----------------|-----------------|----------------|-------------------|----------------|
|             | Cells num.          | % of all cells | Cells num.            | % of all cells | Cells num.        | % of all cells | Cells num.      | % of all cells | Cells num.        | % of all cells |
| -1          | 441                 | 3.14           | 1905                  | 13.57          | 601               | 4.28           | 83              | 0.59           | 346               | 2.47           |
| 0           | 12294               | 87.59          | 11615                 | 82.75          | 12879             | 91.76          | 11677           | 83.19          | 12433             | 88.58          |
| 1           | 1301                | 9.27           | 516                   | 3.68           | 556               | 3.96           | 2276            | 16.22          | 1257              | 8.96           |
| Cells total | 14036               | 100            | 14036                 | 100            | 14036             | 100            | 14036           | 100            | 14036             | 100            |

If the areas, in which the individual differences are concentrated, are identified (Figure 2), it is again clear that this is mainly open terrain, or the immediate vicinity of the Kombutský and Kotvrdovický streams, where slopes with a greater inclination are concentrated.

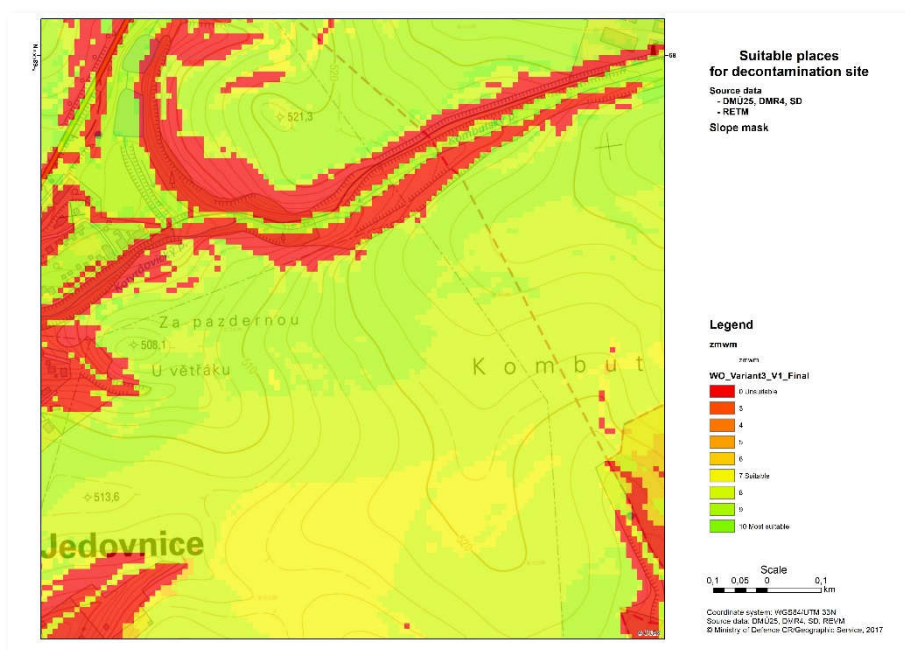

(a)



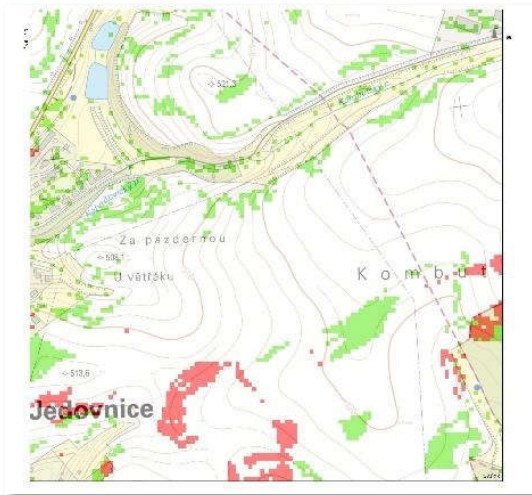

(b)

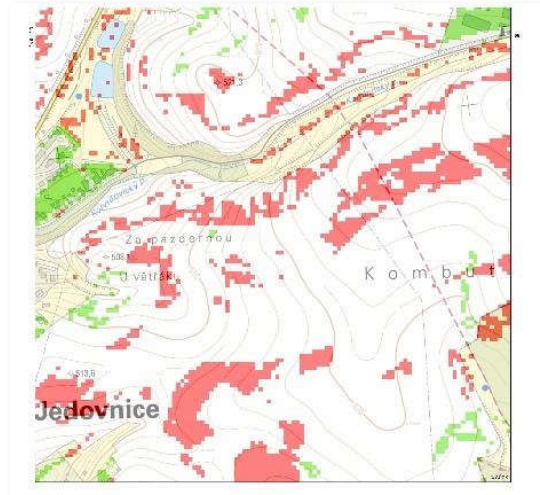

(c)

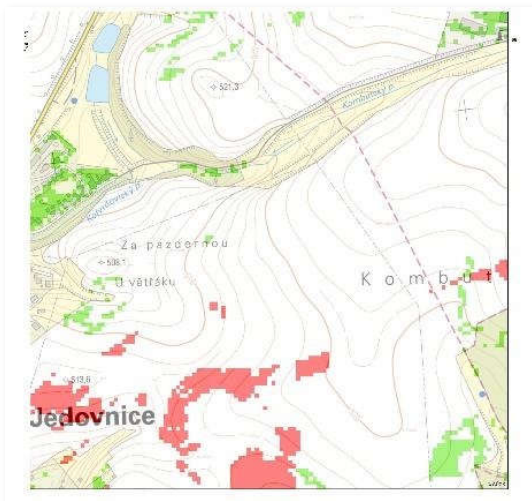

(d)

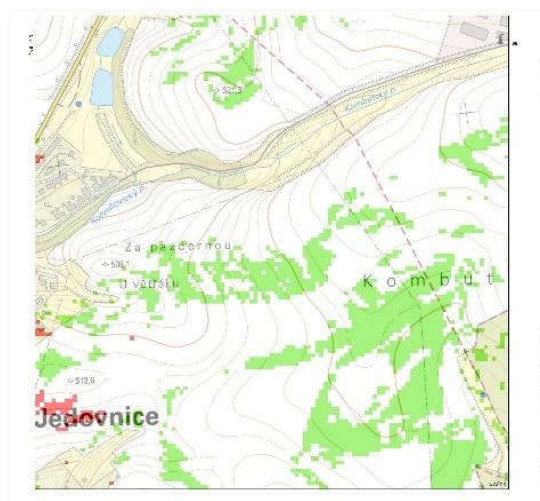

(e)

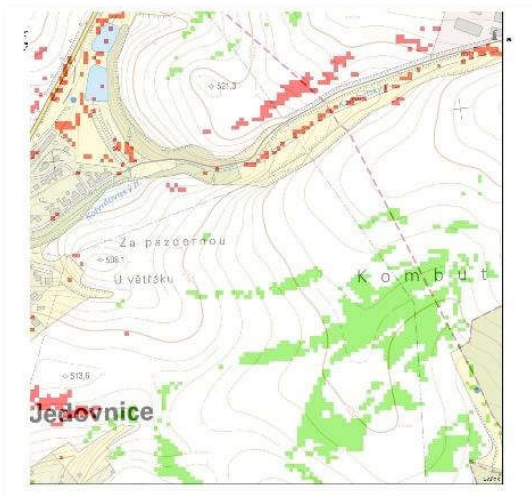

(f)

**Figure 2.** Differences in cost maps of landscape potential for DS deployment for the MCA variants from the Jedovnice area in relation to the Variant 3 variant – (a) Variant 3 cost map, (b) differences with the Experts variant, (c) differences with the Theorists variant, (d) differences with the Pairs variant, (e) differences with the MES variant, (f) differences with the

Saaty variant. Legend: red indicates the difference -1, green the difference +1, white identical areas.

#### *Differences between the Pairs variant and other variants*

The Pairs variant shows a relatively high conformity with the Experts and Variant 3 variants (Table 3). Compared to the Theorists variant, the assessed variant slightly underestimates the area, while in comparison with the MES and Saaty variants, on the contrary, it overestimates the area, especially relatively strongly in comparison with the MES.

**Table 3.** Absolute numbers and percentage share of differences from all pixels in the Jedovnice area for individual MCA variants related to the Pairs variant

| Difference  | Pairs - Experts |                | Pairs - Theorists |                | Pairs - Variant 3 |                | Pairs - MES |                | Pairs - Saaty |                |
|-------------|-----------------|----------------|-------------------|----------------|-------------------|----------------|-------------|----------------|---------------|----------------|
|             | Cells num.      | % of all cells | Cells num.        | % of all cells | Cells num.        | % of all cells | Cells num.  | % of all cells | Cells num.    | % of all cells |
| -1          | 275             | 1.96           | 1432              | 10.20          | 556               | 3.96           | 289         | 2.06           | 648           | 4.62           |
| 0           | 12581           | 89.63          | 12516             | 89.17          | 12879             | 91.76          | 11220       | 79.94          | 11784         | 83.96          |
| 1           | 1180            | 8.41           | 88                | 0.63           | 601               | 4.28           | 2527        | 18.00          | 1604          | 11.43          |
| Cells total | 14036           | 100            | 14036             | 100            | 14036             | 100            | 14036       | 100            | 14036         | 100            |

In terms of the spatial distribution of evaluation differences, the changes are concentrated both in the open landscape, and also relatively significantly in the built-up area and the surroundings of the Kombutský and Kotvrdovický streams. In these areas, the Pairs variant underestimates the space, which is evident from the maps in the figure (Figure 3).

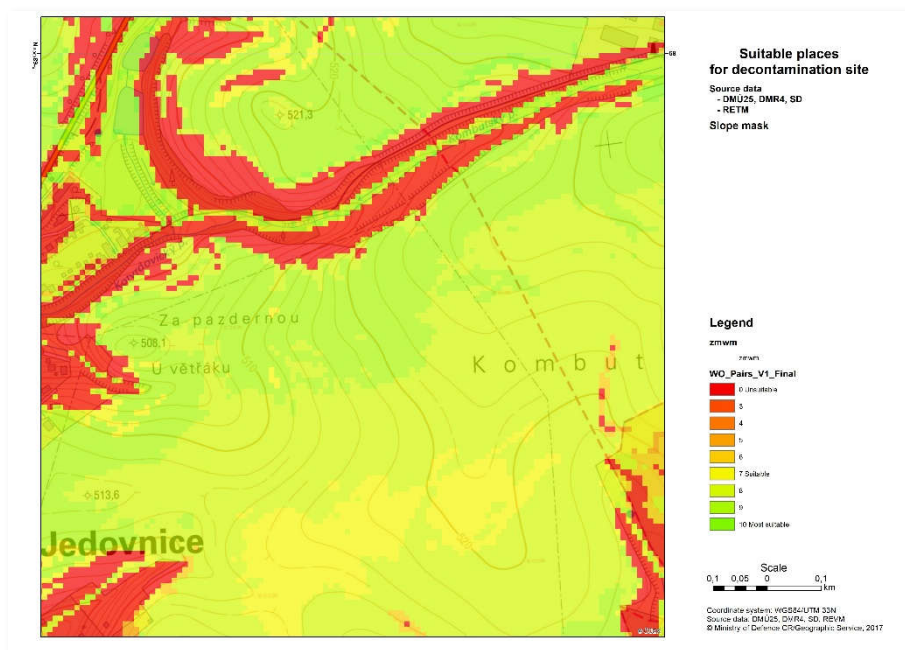

(a)



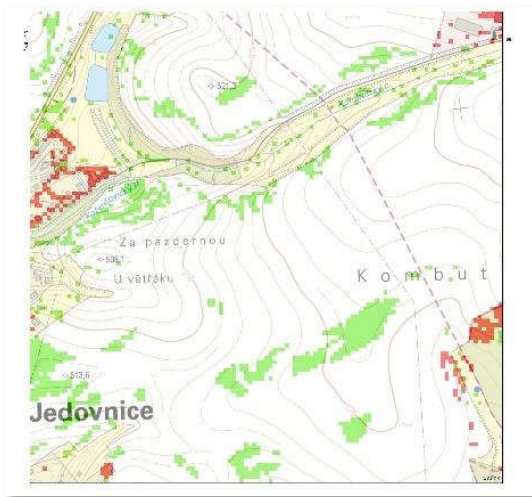

(b)

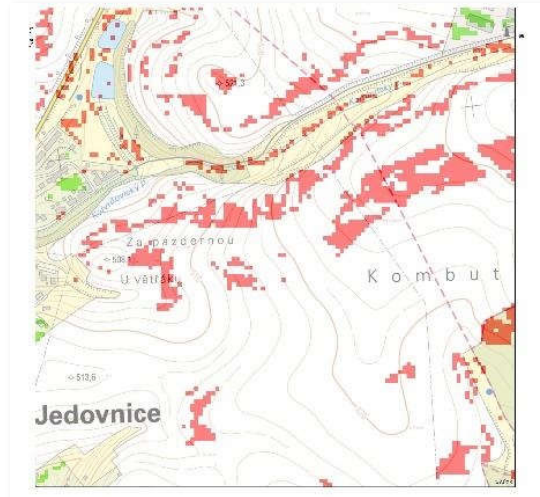

(c)

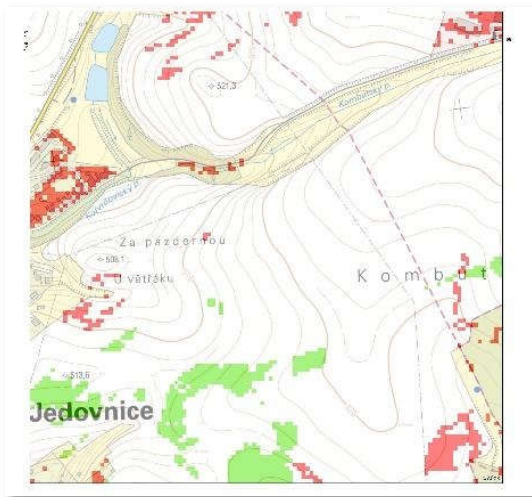

(d)

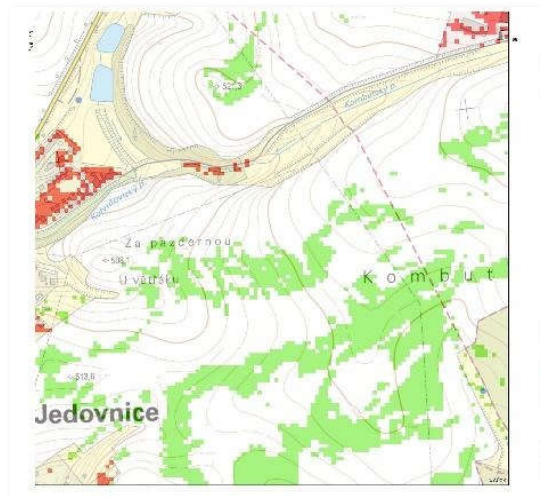

(e)

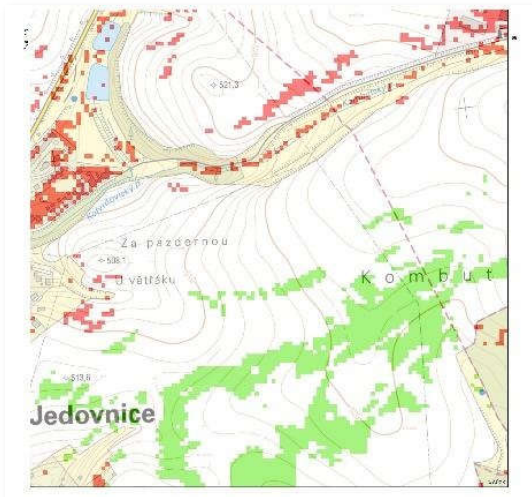

(f)

**Figure 3.** Differences in cost maps of landscape potential for DS deployment for the MCA variants from the Jedovnice area in relation to the Pairs variant – (a) Pairs cost map, (b) differences with the Experts variant, (c) differences with the Theorists variant, (d) differences

with the Variant 3 variant, (e) differences with the MES variant, (f) differences with the Saaty variant. Legend: red indicates the difference -1, green the difference +1, white identical areas.

#### *Differences between the MES variant and other variants*

In comparison with all other variants, the MES variant basically underestimates the suitability of the whole space (Table 4). The biggest differences occur in comparison with the Theorists variant, and the smallest differences in comparison with the Saaty variant. In principle, there is no significant overestimation of the suitability of the space. All significant changes mainly concern the open terrain in the southern half of the assessed area (Figure 4).

**Table 4.** Absolute numbers and percentage share of differences from all pixels in the Jedovnice area for individual MCA variants related to the MES variant

| Difference  | MES - Experts |                | MES - Theorists |                | MES - Variant 3 |                | MES - Pairs |                | MES - Saaty |                |
|-------------|---------------|----------------|-----------------|----------------|-----------------|----------------|-------------|----------------|-------------|----------------|
|             | Cells num.    | % of all cells | Cells num.      | % of all cells | Cells num.      | % of all cells | Cells num.  | % of all cells | Cells num.  | % of all cells |
| -1          | 2086          | 14.86          | 3942            | 28.08          | 2276            | 16.22          | 2527        | 18.00          | 1300        | 9.26           |
| 0           | 11197         | 79.77          | 9734            | 69.35          | 11677           | 83.19          | 11220       | 79.94          | 12718       | 90.61          |
| 1           | 753           | 5.36           | 360             | 2.56           | 83              | 0.59           | 289         | 2.06           | 18          | 0.13           |
| Cells total | 14036         | 100            | 14036           | 100            | 14036           | 100            | 14036       | 100            | 14036       | 100            |

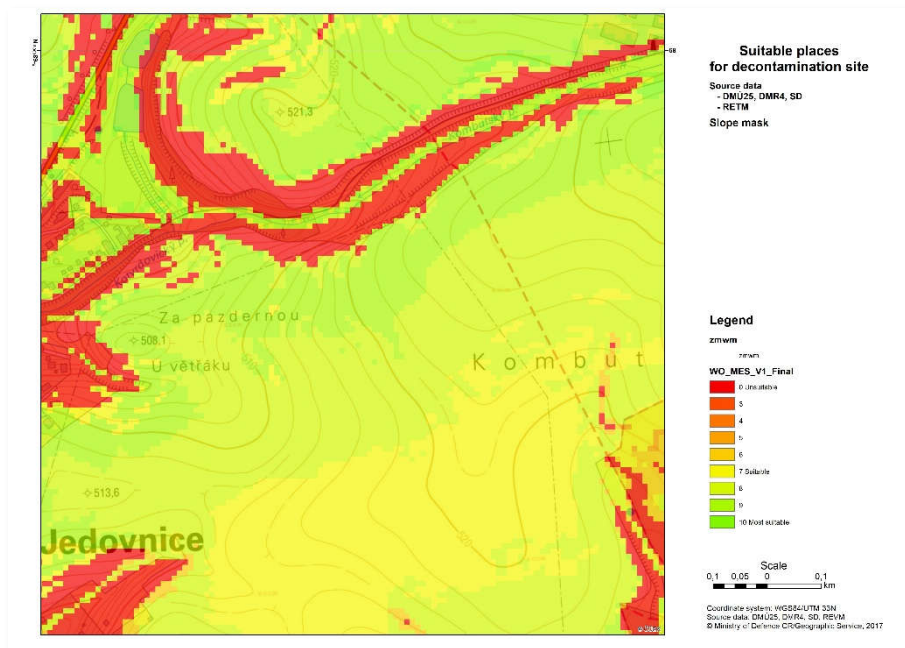

(a)



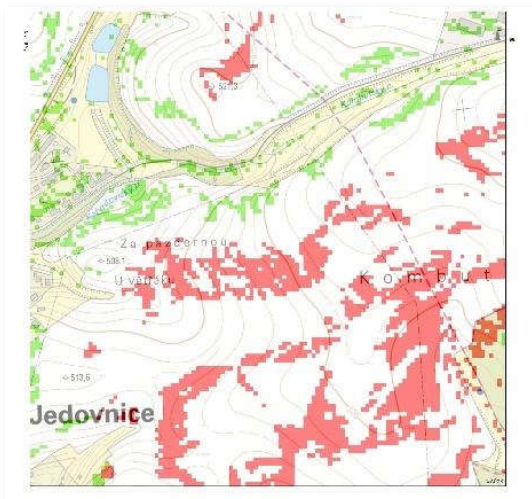

(b)

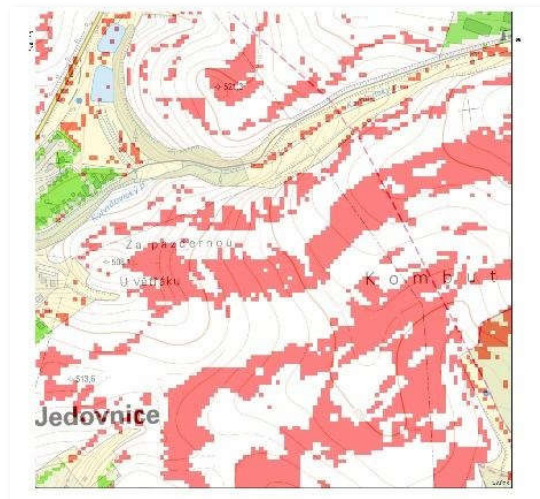

(c)

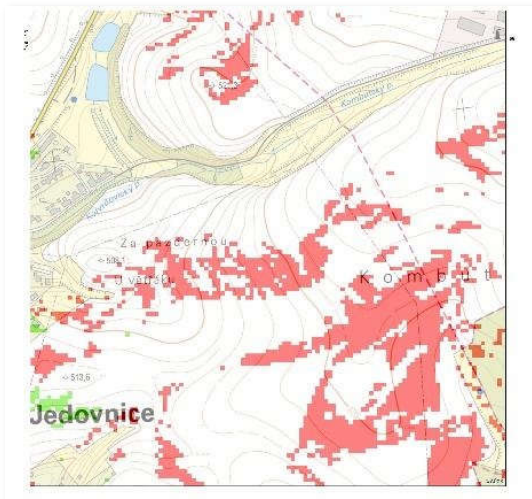

(d)

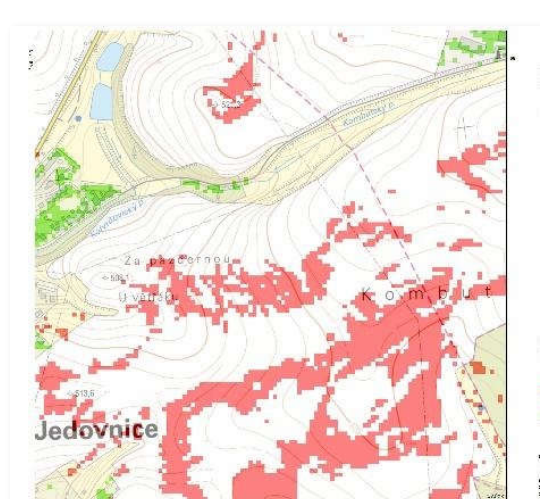

(e)

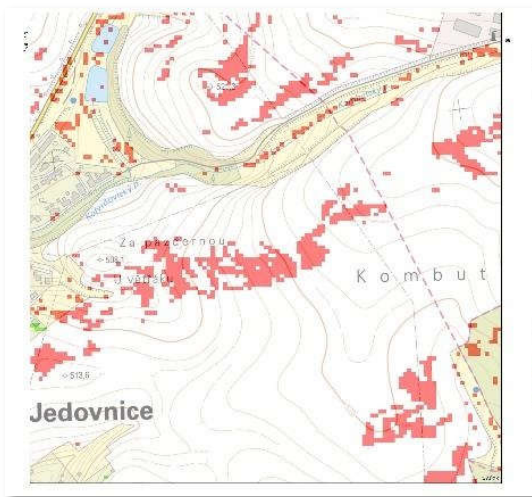

(f)

**Figure 4.** Differences in cost maps of landscape potential for DS deployment for the MCA variants from the Jedovnice area in relation to the MES variant – (a) MES cost map, (b) differences with the Experts variant, (c) differences with the Theorists variant, (d) differences



with the Variant 3 variant, (e) differences with the Pairs variant, (f) differences with the Saaty variant. Legend: red indicates the difference -1, green the difference +1, white identical areas.

#### *Differences between the Saaty variant and other variants*

The last variant considered was the Saaty variant. According to the assessment of the absolute numbers of different pixels (Table 5), it is clear that with the exception of the variant Theorists, this variant has no significant differences in the evaluation of suitability with other variants, and basically evaluates the suitability of the space similarly (Figure 5). The biggest differences occur in the surroundings of the Kombutský and Kotvrdovický streams and the built-up area on the north-eastern edge of Jedovnice, where the assessed variant rather overestimates the area in comparison with other variants. However, there are larger differences when compared to the Theorists variant. The Saaty variant significantly underestimates the area, especially in open space, which is a consequence of the lower weight of the terrain relief factor.

**Table 5.** Absolute numbers and percentage share of differences from all pixels in the Jedovnice area for individual MCA variants related to the Saaty variant

| Difference  | Saaty - Experts |                | Saaty - Theorists |                | Saaty - Varianta 3 |                | Saaty - Pairs |                | Saaty - MES |                |
|-------------|-----------------|----------------|-------------------|----------------|--------------------|----------------|---------------|----------------|-------------|----------------|
|             | Cells num.      | % of all cells | Cells num.        | % of all cells | Cells num.         | % of all cells | Cells num.    | % of all cells | Cells num.  | % of all cells |
| -1          | 1260            | 8.98           | 2697              | 19.21          | 1257               | 8.96           | 1604          | 11.43          | 18          | 0.13           |
| 0           | 11567           | 82.41          | 10942             | 77.96          | 12433              | 88.58          | 11784         | 83.96          | 12718       | 90.61          |
| 1           | 1209            | 8.61           | 397               | 2.83           | 346                | 2.47           | 648           | 4.62           | 1300        | 9.26           |
| Cells total | 14036           | 100            | 14036             | 100            | 14036              | 100            | 14036         | 100            | 14036       | 100            |

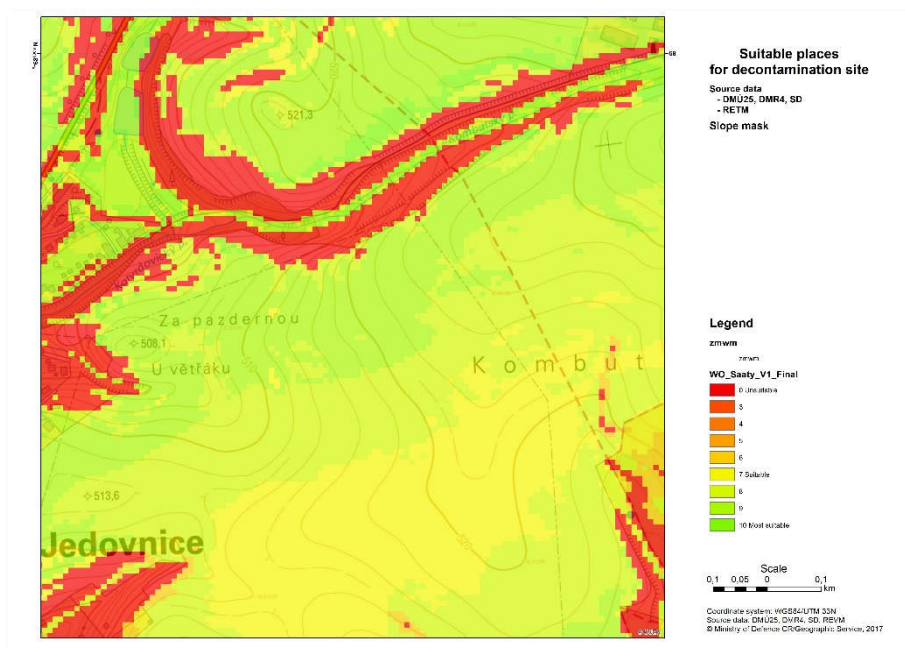

(a)

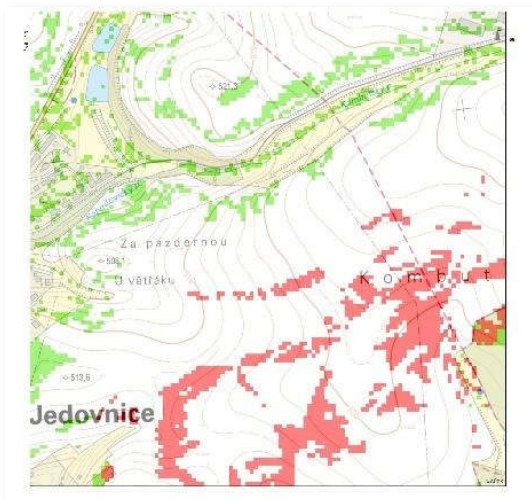

(b)

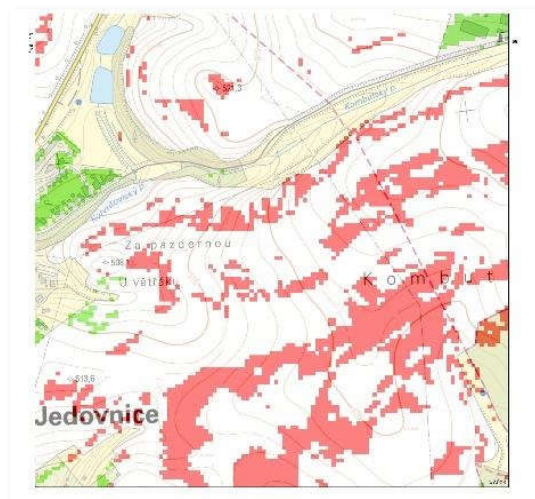

(c)

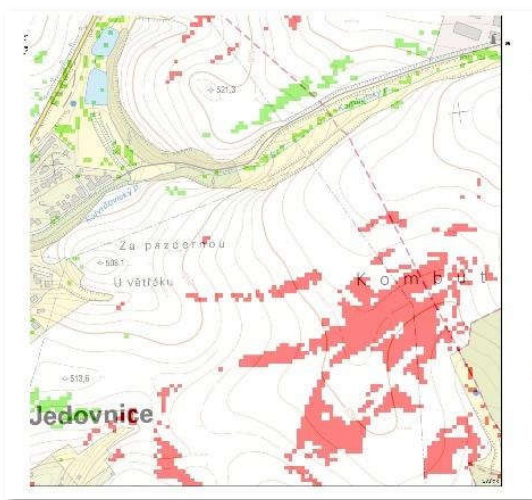

(d)

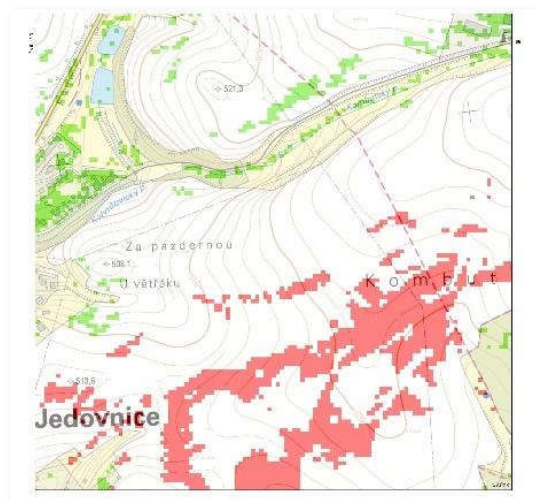

(e)

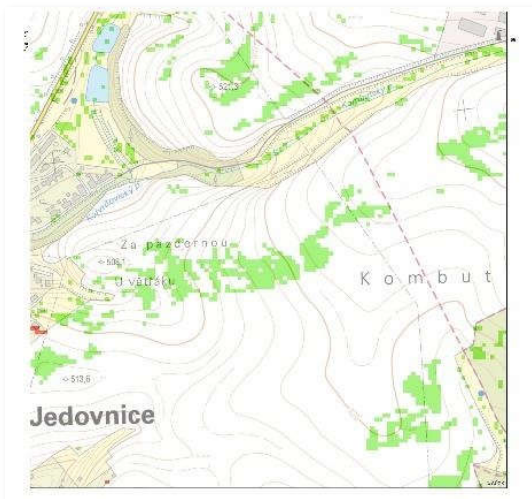

(f)

**Figure 5.** Differences in cost maps of landscape potential for DS deployment for the MCA variants from the Jedovnice area in relation to the Saaty variant – (a) Saaty cost map, (b) differences with the Experts variant, (c) differences with the Theorists variant, (d) differences with the Variant 3 variant, (e) differences with the Pairs variant, (f) differences with the MES variant. Legend: red indicates the difference -1, green the difference +1, white identical areas.
